# Supplementary material
Source: PubMed Central journal article supplement (PMC2649100)
Supplement: M808964200_1.pdf [file M808964200_1.pdf]

Supplemental Figure 1: Domain structure of rabbit kidney hensin

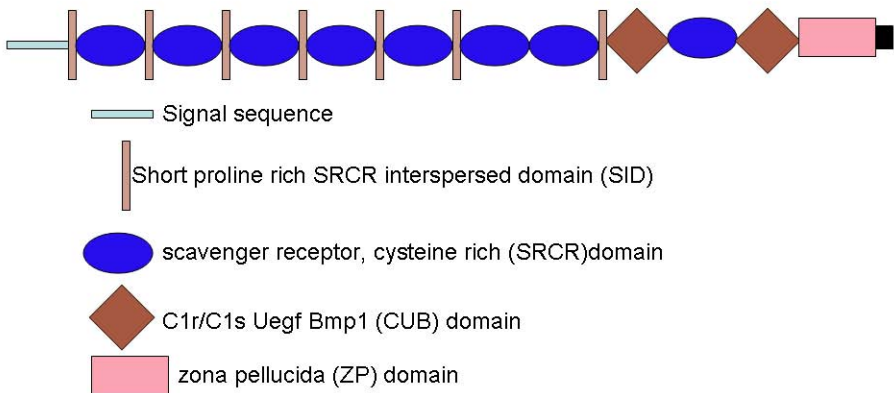

## Supplemental Figure 2: Cyp A Binding Hensin Peptides

MGISTVLALSLLWGPALSQGWIPYTTYHDSVSSPGAPVETTTTEVFPSGLELRLANGGD  
RCQGRVEVLYQGSWGTVCDDGWDINDAQVVCROLGCGMAVSAPGSARFGQPGQIVLDDV  
SCSGQEPYLWSCHHRGWLSHNCGHQEDAGVICSDAMAMTSPPPDTWPTTVIYESTPHFPS  
GLELVFPSGLELRLANGSDRCQGRVEVLYQGSWGTVCDDGWDINDAQVVCROLGCGMAVS  
APGSARFGQPGQIVLDDVSCSGQEPYLWSCHHRGWLSHNCGHQEDAGVICSDAVPTTTP  
FPDTWPTTVIYESSPVFPSGLELRLANGSDRCQGRVEVLYQGSWGTVCDDGWDINDAQV  
CROLGCGTAVSAPGSARFGQPGQIVLDDVSCSGQEPYLWSCHHRGWLSHNCGHQEDAGV  
ICSDAMAMTTPPDTWPTTVIHSTPVFPSGLELQLANGSDRCQGRVEVLYQGTVCDDG  
DINDAQVVCROLGCGMAVSAPGSARFGQPGQIVLDDVSCSGQEPYLWSCHHRGWLSHNC  
GHQEDAGVICSDAMAMTTPPPDTWPTTVIYESTPHFPSGLELRLANGSDRCQGRVEVLYQ  
GSWGTVCDDGWDINDAQVVCROLGCGTAVSAPGSARFGQPGQIVLDDVSCSGQEPYLWS  
CHHRGWLSHNCGHQEDAGVICSGAMDTTTPPDTWPTTVIYESTPVHISGLQLRLVNGSD  
RCEGRVEVLYQGSWGTVCDDSWDLNDASVVCROLGCGTALSAPASAQFGQSSGSI V LDDV  
SCSGSEPNLWSCSHRGWLSHNCGHEDAGVVCSPDRLAVRLVNGSTRCQGRVEVLYRG  
SWGTVCDDSWDINDASVVCROLGCGWAVSAPGSARFGQSGSIFLDEVSCSGQEPYLWNC  
SHRGWLSHNCGHYEDAGVICSDGWTTVTPPAPTDDWWEPTVTTTVGPPSSNCGGFLYNATG  
SFSSPSYPGYYPNNALCVWEIAVPSGYLINLGFSQLRLEQHSYCNFDYVEIFDGSTDSSL  
LGKICNDSGQIFTTSSNRMTVLFRSDISVQNTGFLAWYNSFPRDASLRLVSGNSSYGACA  
GRVEIYHGGRWGTVCDDSWDTQDAQVVCROLQCGDAVSAPGGAYFGSGSPITLDDVNC  
GTEATLWQCRSQQSWFSHNCGHEDASVICTGNYGTTTASVPNIISTSNASYSCGGFLSQHS  
GRFSSPFYPGNYPNNARCVDIEVQNNYQVTVTFTDVQLEGGCQYDYIEVFDGPHYHS SPL  
IARVCDGARGSFSSSNFLSVRFVSDGSITRRGFQAEFYSLPSNDSTNLLCLMNHMQASV  
SRAYLQSLGFSAWELVVSGWNGNYQCQRQITPSQVIFTIPYSGCGTIKQVDNETITYSNF  
LKAAVSSGVIKRKKDLHIHVSCRMLQDSWVHTMYIANDTIEVSEVQYSNFNVNVSFYTSS  
SFSYPVTSSPYVVDLDQNLVYLQAEILHSDASLALFVDTCVASPNPNDFTSVTYDLIRSGC  
VRDETYR SYAQPSPRVVRFENSFHFLNRFPAVYLRCMKMVVCRAYDYSSRCYRGCVVRSK  
RDVGSYQERVDVVLGPIQLLDPPAGKKS PGKGSF

Box-SID domains

Underline-ZP domain

Sequences colored in Yellow and Red correspond to peptides underlined in Yellow and Green in Figure 5.
